# Supplementary material for: Distinct prostate cancer-related mRNA cargo in extracellular vesicle subsets from prostate cell lines
Source: BMC Cancer. 2017 Feb 1;17:92. doi: 10.1186/s12885-017-3087-x (PMC5286827; doi:10.1186/s12885-017-3087-x)
Supplement: Additional file 3: Table S2. — Top Regulated Genes: Distinctly different genes between PC-3 MVs vs PNT2 MVs. (XLSX 10 kb) [file 12885_2017_3087_MOESM3_ESM.xlsx]

## Sheet: Sheet1
TABLE S2. Top Regulated Genes: Distinctly different genes between PC-3 MVs vs PNT2 MVs
Gene Symbol	Name	Unigene ID	RefSeq	Log FC	P Value
Up-regulated
CAMSAP1	Calmodulin regulated spectrin-associated protein 1	Hs.522493	NM_015447	3.52583	0.005538
CAV1	Caveolin 1, caveolae protein, 22kDa	Hs.74034	NM_001753	5.40917	0.009104
CAV2	Caveolin 2	Hs.212332	NM_001233	4.19584	0.001098
GSTP1	Glutathione S-transferase pi 1	Hs.523836	NM_000852	6.2821	0.015274
NRIP1	Nuclear receptor interacting protein 1	Hs.155017	NM_003489	4.13584	0.005028
PES1	Pescadillo homolog 1, containing BRCT domain (zebrafish)	Hs.517543	NM_014303	4.27813	0.000895
TFPI2	Tissue factor pathway inhibitor 2	Hs.438231	NM_006528	4.92787	1e-05
ZNF185	Zinc finger protein 185 (LIM domain)	Hs.16622	NM_007150	3.90872	0.012016
Down-regulated
AR	Androgen receptor	Hs.76704	NM_000044	-6.15416	0.042133
EGR3	Early growth response 3	Hs.534313	NM_004430	-4.97416	0.044806
IGF1	Insulin-like growth factor 1 (somatomedin C)	Hs.160562	NM_000618	-6.94063	0.001979
NKX3-1	NK3 homeobox 1	Hs.55999	NM_006167	-6.15071	0.233481
PTEN	Phosphatase and tensin homolog	Hs.729457	NM_000314	-4.24083	0.046764
RARB	Retinoic acid receptor, beta	Hs.654490	NM_000965	-3.9075	0.049206
SFRP1	Secreted frizzled-related protein 1	Hs.213424	NM_003012	-7.7075	0.041303
SLC5A8	Solute carrier family 5 (iodide transporter), member 8	Hs.444536	NM_145913	-6.48416	0.041823
TMPRSS2	Transmembrane protease, serine 2	Hs.439309	NM_005656	-4.15925	0.032164
TNFRSF10D	Tumor necrosis factor receptor superfamily, member 10d, decoy with truncated death domain	Hs.213467	NM_003840	-5.24468	8.4e-05
Log2 fold-change (mean of the differential mRNA levels); P value for the differential mRNA levels
