# Supplementary material for: Distinct prostate cancer-related mRNA cargo in extracellular vesicle subsets from prostate cell lines
Source: Springer Nature journal article supplement (doi:10.1186/s12885-017-3087-x), 2017-02-01
Supplement: MOESM1 [file 12035454]

## Additional file 1 Supplementary figure

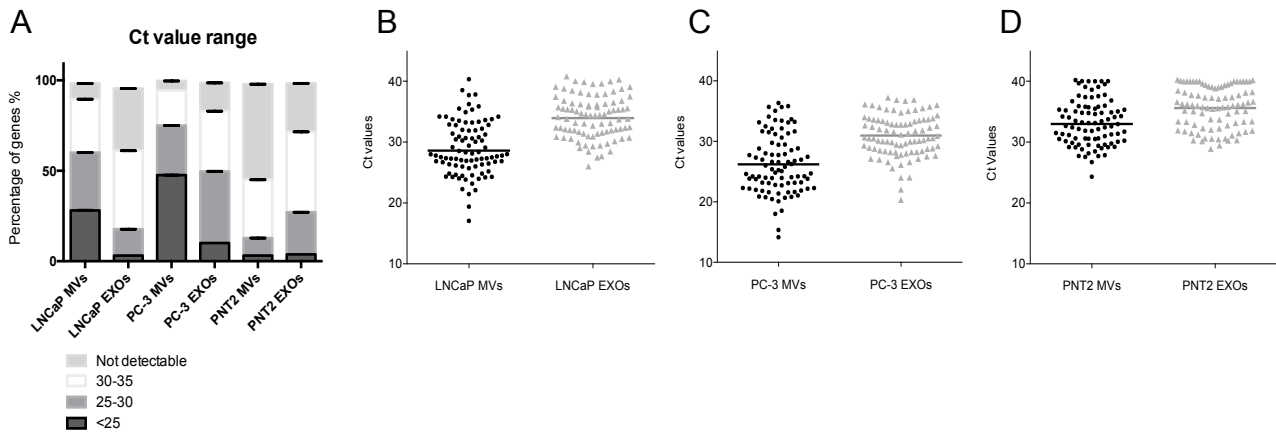

**Figure 1S. RNA analysis of EV subpopulations by RT-qPCR.**

(A) Bar graph representing the threshold cycle (Ct) value range for the percentage of genes detected in LNCaP-, PC-3- and PNT2- MVs and EXOs. Higher Ct values represent lower mRNA enrichment. Bars represent the mean  $\pm$  SEM of three independent experiments per group. (B-D) Individual Ct values representation for the 84 mRNA transcripts detected in LNCaP-, PC-3- and PNT2- MVs and EXOs.
